# Supplementary material
Source: publisher figshare collection journal article supplement (https://frontiersin.figshare.com/ndownloader/files/12480101)
Supplement: Supplementary file [file 12480101]

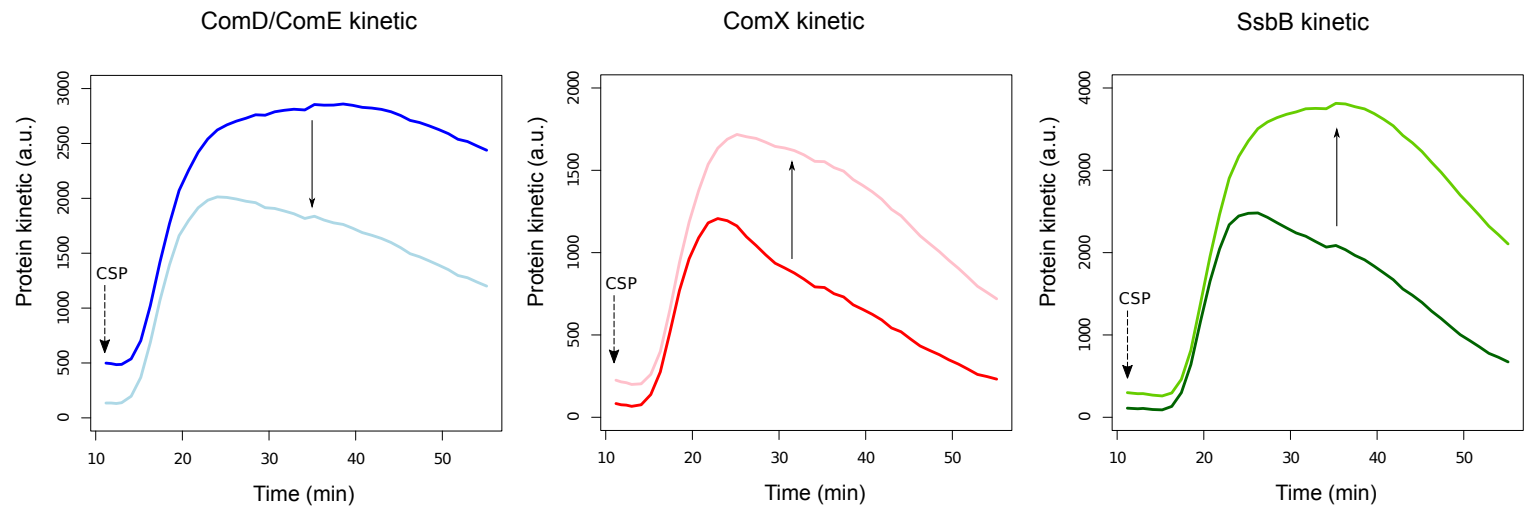

**Figure S2 Comparison of the estimation of protein concentration with or without a correction by the luciferase half-life.** Dark color lines represent the reconstructed protein concentration kinetics by taking into account only protein life time. Light color lines correspond to reconstructed protein kinetics corrected for differences in half-lives between luciferase and the protein whose gene activity is measured using the equation proposed by Stefan and collaborators (Stefan *et al.*, 2015). The protein life times used for computation are: 8 min for ComX and SsbB, 80 min for ComD/ComE and 21.6 min for luciferase.
